# Supplementary material for: Towards Green Strategies of Food Security: Antibacterial Synergy of Essential Oils from Thymus vulgaris and Syzygium aromaticum to Inhibit Escherichia coli and Staphylococcus aureus Pathogenic Food Isolates
Source: MDPI journal article supplement (doi:10.3390/microorganisms10122446), 2022-12-10
Supplement: s1 [file s1]

**Table S1: Morphological characteristics of bacterial cells and results of biochemical tests performed on food isolates.**

| Bacterial isolate    | Gram staining                                         | Oxidase test | Catalase test | Coagulase test |
|----------------------|-------------------------------------------------------|--------------|---------------|----------------|
| <i>E. coli</i> mC1   | -<br>(rod-shaped,<br>1.50x0.50 µm)                    | -            | +             | -              |
| <i>S. aureus</i> mC2 | +<br>(grape clusters<br>spherical-shaped,<br>0.5 µm ) | -            | +             | +              |

Legend: + = positive test; - = negative test
